# Supplementary material
Source: publisher figshare collection journal article supplement (https://karger.figshare.com/ndownloader/files/12856007)
Supplement: Supplementary file 1 [file 12856007]

Supplementary Table 1. Statistical data of tympanic temperature (◦C), body weight gain, food and water consumption of virgin female rats treated with saline, LPS and/or Zinc at different times. N=7/group. Tukey's multiple comparisons test; ns- without significant differences; * P<0.05; **p< 0.01; *** p< 0.001; **** p< 0.00001.

| Groups | Hours | | | | | | | | | |
| --- | --- | --- | --- | --- | --- | --- | --- | --- | --- | --- |
|  | 0 | 2 | 4 | 6 | 8 | 10 | 24 | 48 | 72 | 96 |
| ***Tympanic temperature*** |  |  |  |  |  |  |  |  |  |  |
| S+S vs. LPS+S | ns | **** | **** | ns | ns | * | ns | **** | **** | ns |
| S+S vs. LPS+Zn | ns | ** | ** | * | * | ns | ns | **** | ns | ns |
| LPS+S vs. LPS+Zn | ns | **** | **** | ns | ns | ns | * | **** | **** | ns |
| ***Body weight*** |  |  |  |  |  |  |  |  |  |  |
| S+S vs. LPS+S |  |  |  |  |  |  | ns | ns | ns | ns |
| S+S vs. LPS+Zn |  |  |  |  |  |  | ns | *** | ns | *** |
| LPS+S vs. LPS+Zn |  |  |  |  |  |  | ns | ns | ns | **** |
| ***Food consumption*** |  |  |  |  |  |  |  |  |  |  |
| S+S vs. LPS+S |  | ns |  |  |  |  | ns | ns | ns | ns |
| S+S vs. LPS+Zn |  | ns |  |  |  |  | ns | *** | ns | ns |
| LPS+S vs. LPS+Zn |  | ns |  |  |  |  | ns | ns | ns | ns |
| ***Water consumption*** |  |  |  |  |  |  |  |  |  |  |
| S+S vs. LPS+S |  |  |  |  |  |  | ns | ns | ns | ns |
| S+S vs. LPS+Zn |  |  |  |  |  |  | ns | *** | ns | ns |
| LPS+S vs. LPS+Zn |  |  |  |  |  |  | ns | ns | ns | ns |
